# Supplementary material for: Direct On-Chip Differentiation of Intestinal Tubules from Induced Pluripotent Stem Cells
Source: PubMed Central journal article supplement (PMC7404294; doi:10.3390/ijms21144964), 2020-07-14
Supplement: ijms-21-04964-s001.pdf [file ijms-21-04964-s001.pdf]

**Table S1.** Components of directed differentiation media

| Stage of differentiation | Abbreviation | Component                 | Final concentration | Supplier      | Cat.No     |
|--------------------------|--------------|---------------------------|---------------------|---------------|------------|
| Definitive endoderm      | DE1          | RPMI-1640 Medium          | /                   | Sigma-Aldrich | R0883      |
|                          |              | Penicillin-Streptomycin   | 1x                  | Sigma-Aldrich | P4333      |
|                          |              | Non-essential amino acids | 1x                  | Gibco         | 11140035   |
|                          |              | B27 with insulin          | 1x                  | Gibco         | 17504-044  |
|                          |              | CHIR99021                 | 3 uM                | Bio-Techne    | 4423       |
|                          | DE2          | RPMI-1640 Medium          | /                   | Sigma-Aldrich | R0883      |
|                          |              | Penicillin-Streptomycin   | 1x                  | Sigma-Aldrich | P4333      |
|                          |              | Non-essential amino acids | 1x                  | Gibco         | 11140035   |
|                          |              | B27 with insulin          | 1x                  | Gibco         | 17504-044  |
|                          |              |                           |                     |               |            |
| Hindgut                  | HG           | RPMI-1640 Medium          | /                   | Sigma-Aldrich | R0883      |
|                          |              | Penicillin-Streptomycin   | 1x                  | Sigma-Aldrich | P4333      |
|                          |              | Non-essential amino acids | 1x                  | Gibco         | 11140035   |
|                          |              | FBS                       | 2%                  | ATCC          | 30-2020    |
|                          |              | CHIR99021                 | 2 uM                | Bio-Techne    | 4423       |
|                          |              | FGF 4                     | 500ng/mL            | Peprotech     | 100-31     |
|                          |              | Noggin                    | 100ng/mL            | Peprotech     | 120-10C    |
| Mature intestine         | MI           | DMEM/F12 Medium           | /                   | Gibco         | 31331-028  |
|                          |              | HEPES                     | 15mM                | Gibco         | 15630-056  |
|                          |              | Penicillin-Streptomycin   | 1x                  | Sigma-Aldrich | P4333      |
|                          |              | Non-essential amino acids | 1x                  | Gibco         | 11140035   |
|                          |              | B27 with insulin          | 1x                  | Gibco         | 17504-044  |
|                          |              | Noggin                    | 100 ng/mL           | Peprotech     | 120-10C    |
|                          |              | R-spondin                 | 500 ng/mL           | Peprotech     | 120-38     |
|                          |              | EGF                       | 100 ng/mL           | Sigma-Aldrich | E9644-.2MG |
| MMP-8                    | 10 uM        | Fisher Scientific         | 4442371MG           |               |            |

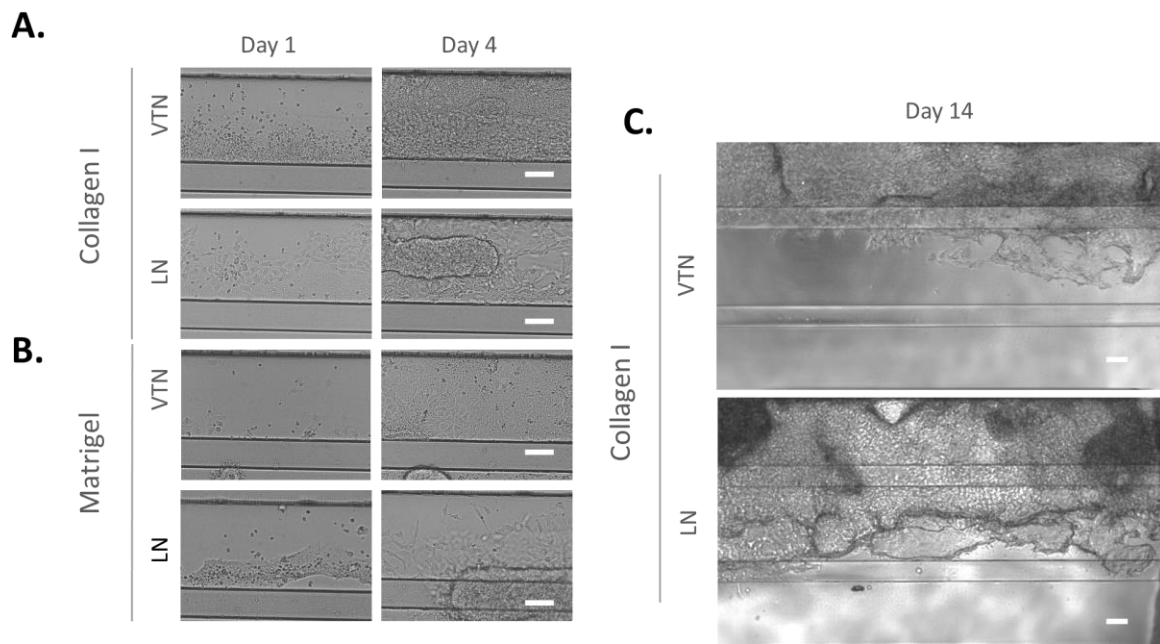

**Figure S1. Optimization of ECM and coating strategy for better attachment and tubule maintenance of iPSC.** Representative 10X phase contrast images of iPSC derived tubules at Day 1 and 4 cultured on Collagen I and human recombinant vitronectin (VTN) or laminin (LN) as coating strategy (A) or Matrigel as ECM and human recombinant vitronectin (VTN) or laminin (LN) as coating strategy (B). C. Representative 10X phase contrast images of iPSC derived tubules at Day 14 with Collagen I as ECM and VTN or LN as a coating strategy. Scale bars=100μm

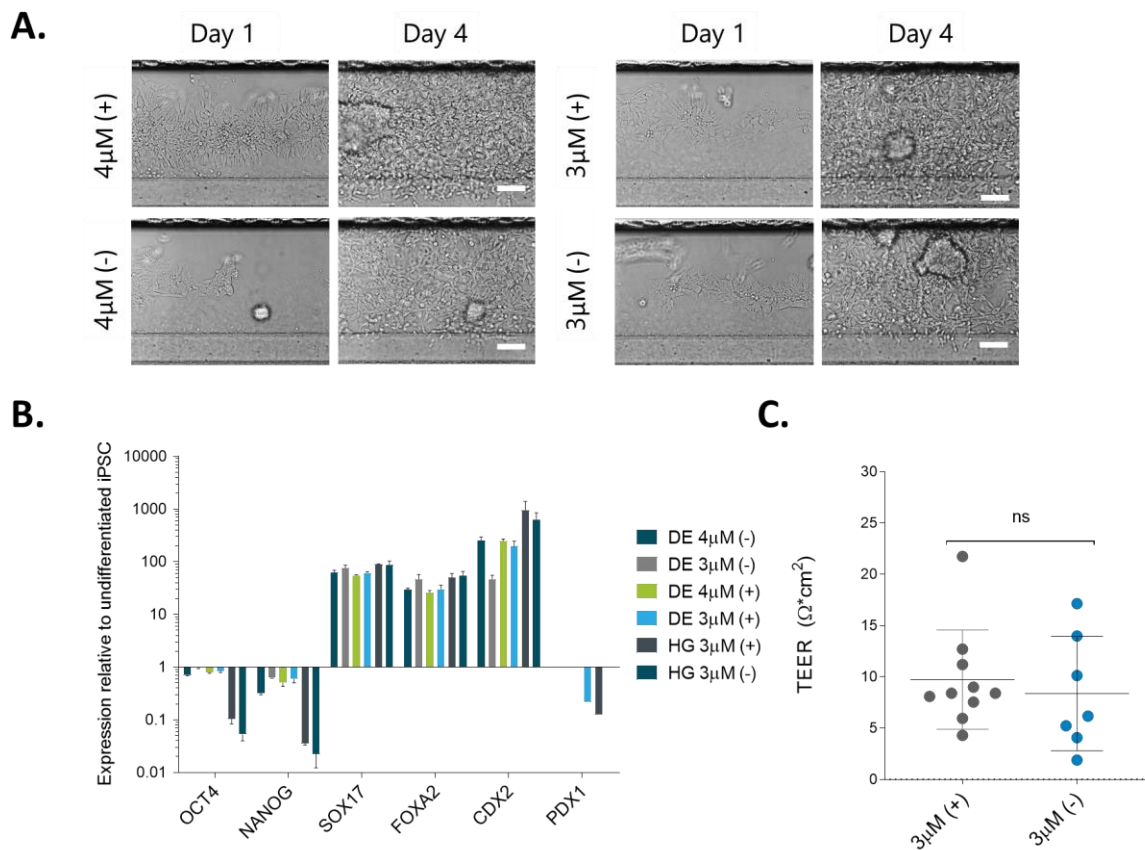

**Figure S2. Endodermal potential screen and barrier integrity of iPSC.** **A.** Representative phase contrast images of iPSC derived tubules at Day 1 and 4 cultured under four different conditions 3 or 4  $\mu\text{M}$  CHIR99021 in RPMI supplemented with either B27 +/- insulin. Scale bars=100 $\mu\text{m}$  **B.** Gene expression were measured using TaqMan pRT-PCR at Day 4 (DE) for all four conditions and Day 7 (HG) for the 3 $\mu\text{M}$  CHIR99021 in RPMI supplemented with either B27 +/- insulin. The following genes were analyzed: Pluripotency: POU class 5 homeobox 1 (POU5F1); Nanog homeobox (NANOG) Primitive Streak; forkhead box a2 (FOXA2) and Definitive Endoderm:FOXA2, SRY (sex determining region Y)-box 17 (SOX17) and markers for Anterior Gut: pancreatic and duodenal homeobox 1 (PDX1) and Posterior Gut Homeobox protein CDX-2. The Y-axis represents the LOG10 relative quantification (RQ). All samples were normalized to beta-actin (ACTB), and to undifferentiated hiPSC. Data is presented as the average of two independent experiments +/- SD (N=2, n $\geq$ 3). **C.** TEER measurements of Day 4 hiPSC derived tubules at DE stage. Significance was tested by ordinary one-way Anova. Data is represented as mean  $\pm$  SD. (N=1, n $\geq$ 6), ns  $p > 0.05$ , \*  $p \leq 0.05$ , \*\*  $p \leq 0.01$ , \*\*\*  $p \leq 0.001$ , \*\*\*\*  $p \leq 0.0001$ .

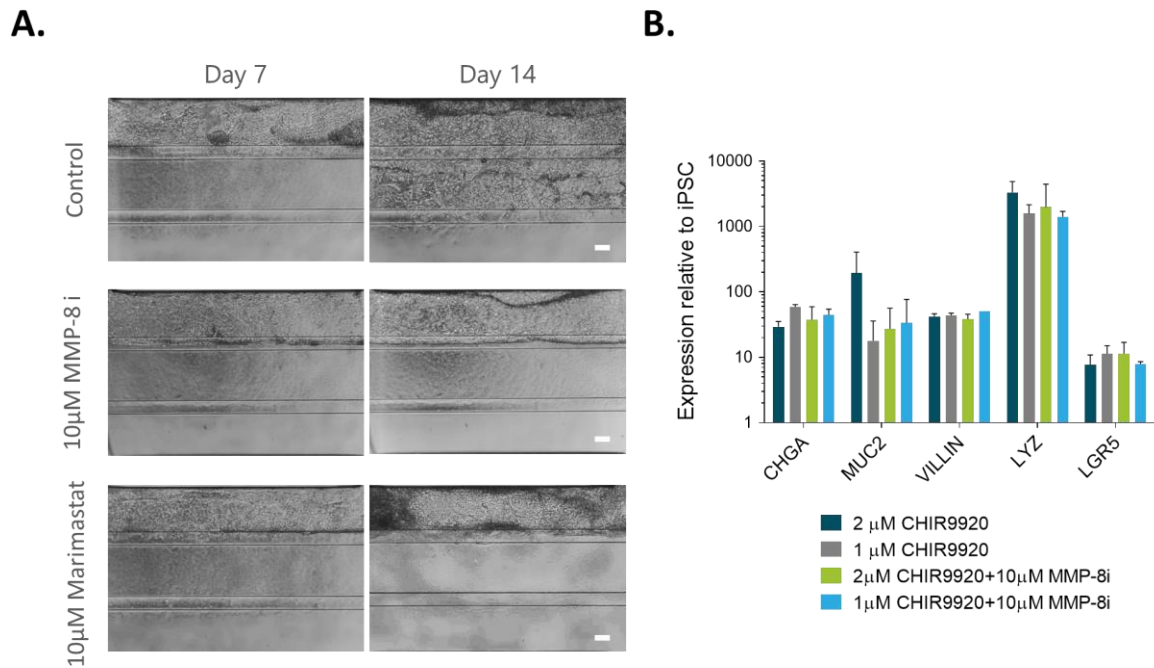

**Figure S3.** Maintenance of tubular shape of differentiated iPSC derived gut-like tubules within a microfluidic device with matrix metalloproteinases inhibitors. A. Representative phase contrast images on day 7 and day 14 per condition. Scale bars=100µm B. Gene expression measured using TaqMan qRT-PCR at day 28 from hiPSC derived gut-like tubules. The following genes were analyzed Leucine-rich repeat-containing G-protein coupled receptor 5 (LGR5), Mucin-2 (MUC2), Lysozyme (LYZ), Villin-1 (VIL1) and Chromogranin A (CHGA) The Y-axis represents the LOG10 relative quantification (RQ). All samples were normalized to beta-actin (ACTB) and expressed as relative to undifferentiated hiPSC. Data is presented as the average of two independent experiments +/- SD (n≥3).
